# Supplementary material
Source: MDPI journal article supplement (https://www.mdpi.com/2077-0472/7/10/86)
Supplement: s1 [file s1]

## Sheet: Tabelle1
Reference	Model approach	Impacts considered	Adaptation options considered
Ahmed, K.F. et al., 2017. Projecting regional climate and cropland changes using a linked biogeophysical-socioeconomic modeling framework: 2. Transient dynamics. J. Adv. Model. Earth Syst., 9(1): 377-388.	decision	yield; food demand	cropland allocation; irrigation; fertilization; crop and cultivar selection
Ahmed, K.F., Wang, G., You, L. and Yu, M., 2016. Potential impact of climate and socioeconomic changes on future agricultural land use in West Africa. Earth Syst. Dyn., 7(1): 151-165.	decision	yield; food demand	cropland allocation; irrigation; fertilization; crop and cultivar selection
Akossou, A.Y.J., Attakpa, E.Y., Fonton, N.H., Sinsin, B. and Bosma, R.H., 2016. Spatial and temporal analysis of maize (Zea mays) crop yields in Benin from 1987 to 2007. Agricultural and Forest Meteorology, 220: 177-189.	empirical	yield	application of organic matter; fertilizers; number and period of weeding
Alabdulkader, A.M., Al-Amoud, A.I. and Awad, F.S., 2016. Adaptation of the agricultural sector to the effects of climate change in arid regions: Competitive advantage date palm cropping patterns under water scarcity conditions. J. Water Clim. Change, 7(3): 514-525	meta-model	yield; water resources	irrigation; cropland allocation
Al-Amin, A.Q. and Filho, W.L., 2014. A return to prioritizing needs: Adaptation or mitigation alternatives? Prog. Dev. Stud., 14(4): 359-371.	biophysical	yield
Al-Wadaey, A., Ziadat, F., Oweis, T., Elkhboli, M. and Alboueichi, A., 2016. Targeting sub-watersheds with conservation practices using SWAT model and GIS techniques in Libya. Biosciences Biotechnology Research Asia, 13(3): 1353-1362	biophysical	yield	irrigation
Amisigo, B.A., McCluskey, A. and Swanson, R., 2015. Modeling impact of climate change on water resources and agriculture demand in the Volta Basin and other basin systems in Ghana. Sustainability (Switzerland), 7(6): 6957-6975.	biophysical	yield; water availability
Arunrat, N., Wang, C., Pumijumnong, N., Sereenonchai, S. and Cai, W., 2017. Farmers' intention and decision to adapt to climate change: A case study in the Yom and Nan basins, Phichit province of Thailand. Journal of Cleaner Production, 143: 672-685.	decision	farmers' decisions	communication processes
Asafu-Adjaye, J., 2014. The economic impacts of climate change on agriculture in Africa. J. Afr. Econ., 23(SUPPL.2): ii17-ii49.	decision	yield; GDP; prices
Aslam, A.Q., Ahmad, S.R., Ahmad, I., Hussain, Y. and Hussain, M.S., 2017. Vulnerability and impact assessment of extreme climatic event: A case study of southern Punjab, Pakistan. Sci. Total Environ., 580: 468-481.	meta-model	yields; livestock production; costs
Audsley, E., Trnka, M., Sabaté, S., Maspons, J., Sanchez, A., Sandars, D., Balek, J. and Pearn, K., 2014. Interactively modelling land profitability to estimate European agricultural and forest land use under future scenarios of climate, socio-economics and adaptation. Climatic Change, 128(3-4): 215-227.	meta-model	yield; profit
Bai, H. and Tao, F., 2017. Sustainable intensification options to improve yield potential and eco-efficiency for rice-wheat rotation system in China. Field Crops Research, 211: 89-105.	biophysical	yield	cultivar selection; sowing date
Bao, Y., Hoogenboom, G., McClendon, R.W. and Paz, J.O., 2015. Potential adaptation strategies for rainfed soybean production in the south-eastern USA under climate change based on the CSM-CROPGRO-Soybean model. J. Agric. Sci., 153(5): 798-824.	biophysical	yield	sowing date; cultivar choice
Beach, R.H., Cai, Y., Thomson, A., Zhang, X., Jones, R., McCarl, B.A. et al., 2015. Climate change impacts on US agriculture and forestry: Benefits of global climate stabilization. Environmental Research Letters, 10(9).	decision	yield; profit	irrigation
Bennett, R.G., Ryan, M.H., Colmer, T.D. and Real, D., 2011. Prioritisation of novel pasture species for use in water-limited agriculture: A case study of Cullen in the Western Australian wheatbelt. Genet. Resour. Crop. Evol., 58(1): 83-100.	suitability	land use potential
Berg, A., De Noblet-Ducoudré, N., Sultan, B., Lengaigne, M. and Guimberteau, M., 2013. Projections of climate change impacts on potential C4 crop productivity over tropical regions. Agricultural and Forest Meteorology, 170: 89-102.	biophysical	yield
Berry, H.L., Hogan, A., Ng, S.P. and Parkinson, A., 2011. Farmer health and adaptive capacity in the face of climate change and variability. part 1: Health as a contributor to adaptive capacity and as an outcome from pressures coping with climate related adversities. International Journal of Environmental Research and Public Health, 8(10): 4039-4054.	decision		adaptive capacity indicators
Biber-Freudenberger, L., Ziemacki, J., Tonnang, H.E.Z. and Borgemeister, C., 2016. Future risks of pest species under changing climatic conditions. PLoS ONE, 11(4).	suitability	pests
Biemans, H., Speelman, L.H., Ludwig, F., Moors, E.J., Wiltshire, A.J., Kumar, P., Gerten, D. and Kabat, P., 2014. Future water resources for food production in five South Asian river basins and potential for adaptation - A modeling study. Sci. Total Environ., 468-469: S117-S131.	biophysical	irrigation demand	irrigation; storage
Bird, D.N. et al., 2016. Modelling climate change impacts on and adaptation strategies for agriculture in Sardinia and Tunisia using AquaCrop and value-at-risk. Sci. Total Environ., 543: 1019-1027.	biophysical	yield	irrigation
Boomiraj, K., Chakrabarti, B., Aggarwal, P.K., Choudhary, R. and Chander, S., 2010. Assessing the vulnerability of Indian mustard to climate change. Agriculture, Ecosystems and Environment, 138(3-4): 265-273.	biophysical	yield	sowing date; cultivar choice
Bosello, F., Campagnolo, L., Cervigni, R. and Eboli, F., 2017. Climate Change and Adaptation: The Case of Nigerian Agriculture. Environmental and Resource Economics: 1-24.	biophysical	yield	irrigation; crop allocation
Brassard, J.P. and Singh, B., 2008. Impacts of climate change and CO2 increase on agricultural production and adaptation options for Southern Québec, Canada. Mitigation Adapt. Strateg. Global Change, 13(3): 241-265.	biophysical	yield
Brouns, K., Eikelboom, T., Jansen, P.C., Janssen, R., Kwakernaak, C., van den Akker, J.J.H. and Verhoeven, J.T.A., 2014. Spatial Analysis of Soil Subsidence in Peat Meadow Areas in Friesland in Relation to Land and Water Management, Climate Change, and Adaptation. Environmental Management, 55(2): 360-372.	biophysical	peat cover	raising ditch water levels
Brown, I., 2017. Climate change and soil wetness limitations for agriculture: Spatial risk assessment framework with application to Scotland. Geoderma, 285: 173-184.	suitability	yield	crop allocation; drainage
Brown, I., Towers, W., Rivington, M. and Black, H.I.J., 2008. Influence of climate change on agricultural land-use potential: Adapting and updating the land capability system for Scotland. Climate Research, 37(1): 43-57.	suitability	land use potential
Buttler, A., Spiegelberger, T., Chételat, J., Kalbermatten, M., Lannas, K., Peringer, A., Wettstein, J.B. and Gillet, F., 2012. Recent and future evolution of the silvopastoral landscape in the Jura vaudois. Schweiz. Z. Forstwes., 163(12): 469-480.	decision	yield; profit	grazing intensity
Byrd, K.B., Flint, L.E., Alvarez, P., Casey, C.F., Sleeter, B.M., Soulard, C.E., Flint, A.L. and Sohl, T.L., 2015. Integrated climate and land use change scenarios for California rangeland ecosystem services: wildlife habitat, soil carbon, and water supply. Landscape Ecology, 30(4): 729-750.	biophysical	water availability; wildlife habitat; soil carbon
Carvalho-Santos, C., Nunes, J.P., Monteiro, A.T., Hein, L. and Honrado, J.P., 2016. Assessing the effects of land cover and future climate conditions on the provision of hydrological services in a medium-sized watershed of Portugal. Hydrol. Process., 30(5): 720-738.	biophysical	water availability; flooding; water quality; soil loss	crop allocation
Chapman, D.S., Scalone, R., Štefanić, E. and Bullock, J.M., 2017. Mechanistic species distribution modeling reveals a niche shift during invasion. Ecology, 98(6): 1671-1680.	suitability	invasive species
Chen, Y. et al., 2017. An assessment of climate change impacts on maize yields in Hebei Province of China. Sci. Total Environ., 581-582: 507-517.	empirical	yield
Chiu, M.C., Hunt, L. and Resh, V.H., 2017. Climate-change influences on the response of macroinvertebrate communities to pesticide contamination in the Sacramento River, California watershed. Sci. Total Environ., 581-582: 741-749.	biophysical	pesticide contamination; macroinvertebrates
Claessens, L., Antle, J.M., Stoorvogel, J.J., Valdivia, R.O., Thornton, P.K. and Herrero, M., 2012. A method for evaluating climate change adaptation strategies for small-scale farmers using survey, experimental and modeled data. Agricultural Systems, 111: 85-95.	biophysical	yield	cultivar choice; livestock breed
Collet, L., Ruelland, D., Estupina, V.B., Dezetter, A. and Servat, E., 2015. Water supply sustainability and adaptation strategies under anthropogenic and climatic changes of a meso-scale Mediterranean catchment. Sci. Total Environ., 536: 589-602.	biophysical	water availability; irrigation demand	irrigation
Colombani, N. and Mastrocicco, M., 2016. Scenario Modelling of Climate Change's Impact on Salinization of Coastal Water Resources in Reclaimed Lands, Procedia Engineering, pp. 25-31.on, D.H., Williams, A.A.J., Power, B., McRae, D. and Davis, P., 2016. Risk matrix approach useful in adapting agriculture to climate change. Climatic Change, 138(1-2): 173-189.	biophysical	aquifer salination	irrigation; drainage
Dawson, T.P., Perryman, A.H. and Osborne, T.M., 2016. Modelling impacts of climate change on global food security. Climatic Change, 134(3): 429-440.	meta-model	yields; livestock production; demands
De Jong, R., Qian, B. and Yang, J.Y., 2008. Modelling nitrogen leaching in Prince Edward Island under climate change scenarios. Can. J. Soil Sci., 88(1): 61-78.	biophysical	nutrient leaching	fertilization
Del Vasto-Terrientes, L., Kumar, V., Chao, T.C. and Valls, A., 2015. A decision support system to find the best water allocation strategies in a Mediterranean river basin in future scenarios of global change. J. Exp. Theor. Artif. Intell.	meta-model	water availability; irrigation demand; industrial water demand; domestic water demand	water allocation
Del Vasto-Terrientes, L., Kumar, V., Chao, T.C. and Valls, A., 2016. A decision support system to find the best water allocation strategies in a Mediterranean river basin in future scenarios of global change. J. Exp. Theor. Artif. Intell., 28(1-2): 331-350.	meta-model	water supply; water demand	use of alternative water sources
Descheemaeker, K., Zijlstra, M., Masikati, P., Crespo, O. and Homann-Kee Tui, S., 2016. Effects of climate change and adaptation on the livestock component of mixed farming systems: A modelling study from semi-arid Zimbabwe. Agricultural Systems.	biophysical	yield; livestock production	soil fertility management; crop diversification
Dhar, S. and Mazumdar, A., 2009. Hydrological modelling of the Kangsabati river under changed climate scenario: Case study in India. Hydrol. Process., 23(16): 2394-2406.	biophysical	water availability; water demand
Diarra, A., Barbier, B. and Yacouba, H., 2013. Adaptation of Sahelian agriculture to climate change: A stochastic modeling approach. Sci. Changements Planetaires - Secheresse, 24(1): 57-63.	decision	yield; profit	availability of forecasts
Dinh, Q., Balica, S., Popescu, I. and Jonoski, A., 2012. Climate change impact on flood hazard, vulnerability and risk of the Long Xuyen Quadrangle in the Mekong Delta. Int. J. River Basin Manage., 10(1): 103-120.	biophysical	flooding
Dono, G. et al., 2016. Winners and losers from climate change in agriculture: Insights from a case study in the Mediterranean basin. Agricultural Systems, 147: 65-75.	biophysical	yield; livestock production
Droogers, P. and Aerts, J., 2005. Adaptation strategies to climate change and climate variability: A comparative study between seven contrasting river basins. Physics And Chemistry Of The Earth, 30(6-7 SPEC. ISS.): 339-346.	biophysical	yield; water availability	irrigation; shift in cropland
Ebi, K.L., Padgham, J., Doumbia, M., Kergna, A., Smith, J., Butt, T. and McCarl, B., 2011. Smallholders adaptation to climate change in Mali. Climatic Change, 108(3): 423-436.	decision	yield; profit	cultivar choice; crop diversification; irrigation; fertilization; soil management; financing instruments
El Chami, D. and Daccache, A., 2015. Assessing sustainability of winter wheat production under climate change scenarios in a humid climate — An integrated modelling framework. Agricultural Systems, 140: 19-25.	decision	yield; GHG emissions; profit	irrigation
Elliott, J. et al., 2017. Characterizing agricultural impacts of recent large-scale US droughts and changing technology and management. Agricultural Systems.	biophysical	yield
Ertürk, A., Ekdal, A., Gürel, M., Karakaya, N., Guzel, C. and Gönenç, E., 2014. Evaluating the impact of climate change on groundwater resources in a small Mediterranean watershed. Sci. Total Environ., 499: 437-447.	biophysical	water availability
Fader, M., Shi, S., Von Bloh, W., Bondeau, A. and Cramer, W., 2016. Mediterranean irrigation under climate change: More efficient irrigation needed to compensate for increases in irrigation water requirements. Hydrology and Earth System Sciences, 20(2): 953-973.	biophysical	yield; irrigation water requirement
Fernández, F.J., Ponce, R.D., Blanco, M., Rivera, D. and Vásquez, F., 2016. Water Variability and the Economic Impacts on Small-Scale Farmers. A Farm Risk-Based Integrated Modelling Approach. Water Resources Management, 30(4): 1357-1373.	biophysical	water resources; costs	crop allocation
Fouial, A., Khadra, R., Daccache, A. and Lamaddalena, N., 2016. Modelling the impact of climate change on pressurised irrigation distribution systems: Use of a new tool for adaptation strategy implementation. Biosystems Engineering, 150: 182-190.	biophysical	water resources	irrigation infrastructure allocation
Gampe, D., Ludwig, R., Qahman, K. and Afifi, S., 2016. Applying the Triangle Method for the parameterization of irrigated areas as input for spatially distributed hydrological modeling - Assessing future drought risk in the Gaza Strip (Palestine). Sci. Total Environ., 543: 877-888.	biophysical	water resources; yield	irrigation
Gao, X. et al., 2017. Farmland–atmosphere feedbacks amplify decreases in diffuse nitrogen pollution in a freeze-thaw agricultural area under climate warming conditions. Sci. Total Environ., 579: 484-494.	biophysical	water resources; water quality	land use; land management
Giuliani, M., Li, Y., Castelletti, A. and Gandolfi, C., 2016. A coupled human-natural systems analysis of irrigated agriculture under changing climate. Water Resources Research, 52(9): 6928-6947.	meta-model	water supply; water demand; yield	land use; irrigation allocation; policies
Gornott, C. and Wechsung, F., 2015. Level normalized modeling approach of yield volatility for winter wheat and silage maize on different scales within Germany. J. Kulturpflanzen, 67(6): 205-223.	empirical	yield
Guan, K., Sultan, B., Biasutti, M., Baron, C. and Lobell, D.B., 2017. Assessing climate adaptation options and uncertainties for cereal systems in West Africa. Agricultural and Forest Meteorology, 232: 291-305.	biophysical	yield	water harvesting; cultivar change; sowing date; sowing density; fertilization
Guo, Y. and Shen, Y., 2016. Agricultural water supply/demand changes under projected future climate change in the arid region of northwestern China. Journal of Hydrology, 540: 257-273.	biophysical	water supply; water demand	irrigation
Han, J., Jia, Z., Wu, W., Li, C., Han, Q. and Zhang, J., 2014. Modeling impacts of film mulching on rainfed crop yield in Northern China with DNDC. Field Crops Research, 155: 202-212.	biophysical	yield	film mulching
Hanson, R.T., Flint, L.E., Flint, A.L., Dettinger, M.D., Faunt, C.C., Cayan, D. and Schmid, W., 2012. A method for physically based model analysis of conjunctive use in response to potential climate changes. Water Resources Research, 48(2).	biophysical	water availability; irrigation demand	irrigation
Hobbs, T.J., Neumann, C.R., Meyer, W.S., Moon, T. and Bryan, B.A., 2016. Models of reforestation productivity and carbon sequestration for land use and climate change adaptation planning in South Australia. Journal of Environmental Management, 181: 279-288.	empirical	carbon sequestration; forest yield	planting density; selection of trees/shrubs
Holman, I.P., Brown, C., Janes, V. and Sandars, D., 2017. Can we be certain about future land use change in Europe? A multi-scenario, integrated-assessment analysis. Agricultural Systems, 151: 126-135.	meta-model	yield; flooding; water supply	land use allocation
Holman, I.P., Rounsevell, M.D.A., Shackley, S., Harrison, P.A., Nicholls, R.J., Berry, P.M. and Audsley, E., 2005. A regional, multi-sectoral and integrated assessment of the impacts of climate and socio-economic change in the UK: Part I. Methodology. Climatic Change, 71(1-2): 9-41.	biophysical	yield; water availability; wildlife habitat
Holzkämper, A., Klein, T., Seppelt, R. and Fuhrer, J., 2015. Assessing the propagation of uncertainties in multi-objective optimization for agro-ecosystem adaptation to climate change. Environ. Model. Softw., 66: 27-35.	biophysical	yield; nutrient leaching; soil loss	rotations; irrigation; fertilization; soil management
Hossain, M.S., Dearing, J.A., Eigenbrod, F. and Johnson, F.A., 2017. Operationalizing safe operating space for regional social-ecological systems. Sci. Total Environ., 584-585: 673-682.	meta-model	yield; GDP; income	policies
Iglesias, A., 1997. Modelling crop-climate interactions in Spain: Vulnerability and adaptation of different agricultural systems to climate change. Mitigation Adapt. Strateg. Global Change, 1(3): 273-288.	biophysical	yield
Irwin, E. et al., 2016. Human adaptations in food, energy, and water systems. Journal of Environmental Studies and Sciences, 6(1): 127-139.	meta-model	demand and supply of food, energy and water	consumer decisions; migration; land use change; governance change; social change
Islam, S. et al., 2016. Structural approaches to modeling the impact of climate change and adaptation technologies on crop yields and food security. Global Food Security, 10: 63-70.	decision	yield; commodity prices	crop and cultivar choice
Jägermeyr, J. et al., 2016. Integrated crop water management might sustainably halve the global food gap. Environmental Research Letters, 11(2).	biophysical	yield	water harvesting; irrigation; alleviated soil evaporation
Jiang, Y. and Koo, W.W., 2014. Estimating the local effect of weather on field crop production with unobserved producer behavior: A bioeconomic modeling framework. Environ. Econ. Policy Stud., 16(3): 279-302.	empirical	yield
Jin, Z. et al., 2017. The combined and separate impacts of climate extremes on the current and future US rainfed maize and soybean production under elevated CO2. Global Change Biology, 23(7): 2687-2704.	biophysical	yield; heat and drought stresses
Kandulu, J.M., Bryan, B.A., King, D. and Connor, J.D., 2012. Mitigating economic risk from climate variability in rain-fed agriculture through enterprise mix diversification. Ecol. Econ., 79: 105-112.	decision	yield; profit	crop diversification
Kikoyo, D.A. and Nobert, J., 2016. Assessment of impact of climate change and adaptation strategies on maize production in Uganda. Physics and Chemistry of the Earth, 93: 37-45.	biophysical	yield
Klein, T., Holzkämper, A., Calanca, P. and Fuhrer, J., 2014. Adaptation options under climate change for multifunctional agriculture: A simulation study for western Switzerland. Regional Environmental Change, 14(1): 167-184.	biophysical	yield; irrigation demand; soil loss; nutrient leaching	rotations
Knox, J., Daccache, A., Hess, T. and Haro, D., 2016. Meta-analysis of climate impacts and uncertainty on crop yields in Europe. Environmental Research Letters, 11(11).	meta-model	yields of different crops
Koch, H., Liersch, S. and Hattermann, F.F., 2013. Integrating water resources management in eco-hydrological modelling. Water Science And Technology, 67(7): 1525-1533.	biophysical	water availability; irrigation demand
Laanaia, N., Carrer, D., Calvet, J.C. and Pagé, C., 2016. How will climate change affect the vegetation cycle over France? A generic modeling approach. Climate Risk Management, 13: 31-42.	biophysical	yields; soil moisture; phenology
Läderach, P. et al., 2017. Climate change adaptation of coffee production in space and time. Climatic Change, 141(1): 47-62.	suitability	coffee suitability and quality
Lapola, D.M., Schaldach, R., Alcamo, J., Bondeau, A., Msangi, S., Priess, J.A., Silvestrini, R. and Soares-Filho, B.S., 2011. Impacts of climate change and the end of deforestation on land use in the Brazilian Legal Amazon. Earth Interact., 15(16): 1-29.	biophysical	yield	shift in cropland
Laux, P., Jäckel, G., Tingem, R.M. and Kunstmann, H., 2010. Impact of climate change on agricultural productivity under rainfed conditions in Cameroon-A method to improve attainable crop yields by planting date adaptations. Agricultural and Forest Meteorology, 150(9): 1258-1271.	biophysical	yield	sowing date
Lebel, S., Fleskens, L., Forster, P.M., Jackson, L.S. and Lorenz, S., 2015. Evaluation of In Situ Rainwater Harvesting as an Adaptation Strategy to Climate Change for Maize Production in Rainfed Africa. Water Resources Management, 29(13): 4803-4816.	biophysical	irrigation demand	water storage
Leclère, D., Jayet, P.A. and de Noblet-Ducoudré, N., 2013. Farm-level Autonomous Adaptation of European Agricultural Supply to Climate Change. Ecol. Econ., 87: 1-14.	decision	yield; profit	crop mix; farm input schedules
Li, Y., Wu, W., Ge, Q., Zhou, Y. and Xu, C., 2016. Simulating climate change impacts and adaptive measures for rice cultivation in hunan province, China. J. Appl. Meteorol. Climatol., 55(6): 1359-1376.	biophysical	yield	sowing date; cultivar choice
Lieffering, M., Newton, P.C.D., Vibart, R. and Li, F.Y., 2016. Exploring climate change impacts and adaptations of extensive pastoral agriculture systems by combining biophysical simulation and farm system models. Agricultural Systems, 144: 77-86.	biophysical	yield; livestock production	farming intensities
Liu, Z., Hubbard, K.G., Lin, X. and Yang, X., 2013. Negative effects of climate warming on maize yield are reversed by the changing of sowing date and cultivar selection in Northeast China. Global Change Biology, 19(11): 3481-3492.	biophysical	yield	sowing date; cultivar choice
Lobell, D.B., Sibley, A. and Ivan Ortiz-Monasterio, J., 2012. Extreme heat effects on wheat senescence in India. Nature Climate Change, 2(3): 186-189.	biophysical	yield	sowing date
Luhunga, P.M., 2017. Assessment of the impacts of climate change on maize production in the southern and western highlands sub-agro ecological Zones of Tanzania. Frontiers in Environmental Science, 5(AUG).	biophysical	yield
Luo, Q., Bange, M. and Devoil, P., 2016. Effects of a wheat rotation on cotton production in a changing climate: A simulation study. Climate Research, 70(1): 29-38	biophysical	yield	rotations
Lurette, A., Aubron, C. and Moulin, C.H., 2013. A simple model to assess the sensitivity of grassland dairy systems to scenarios of seasonal biomass production variability. Computers and Electronics in Agriculture, 93: 27-36.	decision	yield; profit	livestock herd characteristics; pasture grazing & cutting calendar; feeding calendar
Maier, N. and Dietrich, J., 2016. Using SWAT for Strategic Planning of Basin Scale Irrigation Control Policies: a Case Study from a Humid Region in Northern Germany. Water Resources Management, 30(9): 3285-3298.	biophysical	yield; water resources	irrigation; crop allocation
Malviya, S., Priyanka, N., Irfan-Ullah, M., Davande, S. and Joshi, P.K., 2013. Distribution potential of simarouba glauca under climate change - Strategizing rural livelihood adaptation. Int. J. Geoinformatics, 9(1): 31-37.	suitability	land use potential
Mango, L.M., Melesse, A.M., McClain, M.E., Gann, D. and Setegn, S.G., 2011. Land use and climate change impacts on the hydrology of the upper Mara River Basin, Kenya: Results of a modeling study to support better resource management. Hydrology And Earth System Sciences, 15(7): 2245-2258.	biophysical	water availability
Maniruzzaman, M., Talukder, M.S.U., Khan, M.H., Biswas, J.C. and Nemes, A., 2015. Validation of the AquaCrop model for irrigated rice production under varied water regimes in Bangladesh. Agric. Water Manage., 159: 331-340.	biophysical	yield	irrigation
Maraseni, T.N., Mushtaq, S. and Reardon-Smith, K., 2012. Integrated analysis for a carbon- and water-constrained future: An assessment of drip irrigation in a lettuce production system in eastern Australia. Journal of Environmental Management, 111: 220-226.	decision	yield; irrigation demand; water availability; GHG emissions; profit	irrigation
Matchett, E.L. and Fleskes, J.P., 2017. Projected impacts of climate, urbanization, water management, and wetland restoration on waterbird habitat in California's Central Valley. PLoS ONE, 12(1).	meta-model	waterbird habitat	management intensities
Mauser, W. and Bach, H., 2009. PROMET - Large scale distributed hydrological modelling to study the impact of climate change on the water flows of mountain watersheds. Journal of Hydrology, 376(3-4): 362-377.	biophysical	water availability
McCarl, B.A., Musumba, M., Smith, J.B., Kirshen, P., Jones, R., El-Ganzori, A. et al., 2015. Climate change vulnerability and adaptation strategies in Egypt’s agricultural sector. Mitigation Adapt. Strateg. Global Change, 20(7): 1097-1109.	decision	yield; livestock; irrigation demand; water availabililty; profit	farm inputs
Mechler, R., Hochrainer, S., Aaheim, A., Salen, H. and Wreford, A., 2010. Modelling economic impacts and adaptation to extreme events: Insights from European case studies. Mitigation Adapt. Strateg. Global Change, 15(7): 737-762.	decision	yield; profit	irrigation; financing instruments
Moore, F.C., Baldos, U.L.C. and Hertel, T., 2017. Economic impacts of climate change on agriculture: A comparison of process-based and statistical yield models. Environmental Research Letters, 12(6).	biophysical; empirical	yield
Naresh Kumar, S., Aggarwal, P.K., Swaroopa Rani, D.N., Saxena, R., Chauhan, N. and Jain, S., 2014. Vulnerability of wheat production to climate change in India. Climate Research, 59(3): 173-187.	biophysical	yield	sowing date; cultivar choice; fertilization; irrigation
Nkomozepi, T. and Chung, S.O., 2012. Assessing the trends and uncertainty of maize net irrigation water requirement estimated from climate change projections for Zimbabwe. Agric. Water Manage., 111: 60-67.	biophysical	yield; irrigation demand	irrigation
Ojeda-Bustamante, W., Ontiveros-Capurata, R.E., Flores-Velázquez, J. and Iñiguez-Covarrubias, M., 2017. Changes in water demands under adaptation actions to climate change in an irrigation district. J. Water Clim. Change, 8(2): 191-202.	biophysical	yield; water demands	sowing date
Okada, M., Iizumi, T., Sakurai, G., Hanasaki, N., Sakai, T., Okamoto, K. and Yokozawa, M., 2015. Modeling irrigation-based climate change adaptation in agriculture: Model development and evaluation in Northeast China. J. Adv. Model. Earth Syst., 7(3): 1409-1424.	biophysical	yield; water availability; irrigation demand	irrigation
Pande, S. and Savenije, H.H.G., 2016. A sociohydrological model for smallholder farmers in Maharashtra, India. Water Resources Research, 52(3): 1923-1947.	meta-model	yield; livestock production	crop choice; water storage capacity; irrigation; capital
Pelizaro, C., Benke, K. and Sposito, V., 2011. A Modelling Framework for Optimisation of Commodity Production by Minimising the Impact of Climate Change. Appl. Spat. Anal. Policy, 4(3): 201-222.	suitability	land use potential
Perdinan, Adi, R.F. and Arini, E.Y., 2017. Regional Analysis of Prone Drought Areas under Future Climate Change Scenarios: Case Study Agropolitan of Malang District, IOP Conference Series: Earth and Environmental Science.	suitability	drought limitation
Piniewski, M., Kardel, I., Giełczewski, M., Marcinkowski, P. and Okruszko, T., 2014. Climate change and agricultural development: Adapting polish agriculture to reduce future nutrient loads in a coastal watershed. Ambio, 43(5): 644-660.	biophysical	water quality	fertilization; buffer zones; cover crops
Pulido-Velazquez, M., Peña-Haro, S., García-Prats, A., Mocholi-Almudever, A.F., Henriquez-Dole, L., Macian-Sorribes, H. and Lopez-Nicolas, A., 2015. Integrated assessment of the impact of climate and land use changes on groundwater quantity and quality in the Mancha Oriental system (Spain). Hydrology And Earth System Sciences, 19(4): 1677-1693.	biophysical	water availability; water quality
Quilbé, R., Rousseau, A.N., Moquet, J.S., Savary, S., Ricard, S. and Garbouj, M.S., 2008. Hydrological responses of a watershed to historical land use evolution and future land use scenarios under climate change conditions. Hydrology And Earth System Sciences, 12(1): 101-110.	biophysical	water availability
Ramirez-Villegas, J., Jarvis, A. and Läderach, P., 2013. Empirical approaches for assessing impacts of climate change on agriculture: The EcoCrop model and a case study with grain sorghum. Agricultural and Forest Meteorology, 170: 67-78.	suitability	land use potential
Ranjitkar, S. et al., 2016. Climate modelling for agroforestry species selection in Yunnan Province, China. Environ. Model. Softw., 75: 263-272.	suitability	agroforestry species suitability	species selection
Rankinen, K., Peltonen-Sainio, P., Granlund, K., Ojanen, H., Laapas, M., Hakala, K., Sippel, K., Helenius, J. and Forsius, M., 2013. Climate change adaptation in arable land use, and impact on nitrogen load at catchment scale in northern agriculture. Agr. Food Sci., 22(3): 342-355.	biophysical	water availability; water quality
Reidsma, P., Wolf, J., Kanellopoulos, A., Schaap, B.F., Mandryk, M., Verhagen, J. and Van Ittersum, M.K., 2015. Climate change impact and adaptation research requires integrated assessment and farming systems analysis: A case study in the Netherlands. Environmental Research Letters, 10(4).	decision	yield; profit
Renaud-Gentié, C., Dijkman, T.J., Bjørn, A. and Birkved, M., 2015. Pesticide emission modelling and freshwater ecotoxicity assessment for Grapevine LCA: adaptation of PestLCI 2.0 to viticulture. International Journal of Life Cycle Assessment, 20(11): 1528-1543.	meta-model	water quality
Rezaei Zaman, M., Morid, S. and Delavar, M., 2016. Evaluating climate adaptation strategies on agricultural production in the Siminehrud catchment and inflow into Lake Urmia, Iran using SWAT within an OECD framework. Agricultural Systems, 147: 98-110.	biophysical	discharge	cropping patterns
Riediger, J., Breckling, B., Nuske, R.S. and Schröder, W., 2014. Will climate change increase irrigation requirements in agriculture of Central Europe? A simulation study for Northern Germany. Env. Sci. Eur., 26(1).	biophysical	irrigation demand	irrigation
Risbey, J., Kandlikar, M., Dowlatabadi, H. and Graetz, D., 1999. Scale, context, and decision making in agricultural adaptation to climate variability and change. Mitigation Adapt. Strateg. Global Change, 4(2): 137-165.	decision	yield; profit	cultivar choice; availability of seasonal forecasts
Rodriguez, D., Cox, H., deVoil, P. and Power, B., 2014. A participatory whole farm modelling approach to understand impacts and increase preparedness to climate change in Australia. Agricultural Systems, 126: 50-61.	decision	yield; profit
Rodriguez-Lloveras, X., Buytaert, W. and Benito, G., 2016. Land use can offset climate change induced increases in erosion in Mediterranean watersheds. Catena, 143: 244-255.	biophysical	soil loss	land use change
Rötter, R.P., Palosuo, T., Pirttioja, N.K., Dubrovsky, M., Salo, T., Fronzek, S. et al., 2011. What would happen to barley production in Finland if global warming exceeded 4°C? A model-based assessment. European Journal of Agronomy, 35(4): 205-214.	biophysical	yield	sowing date; cultivar choice
Roudier, P., Alhassane, A., Baron, C., Louvet, S. and Sultan, B., 2016. Assessing the benefits of weather and seasonal forecasts to millet growers in Niger. Agricultural and Forest Meteorology, 223: 168-180.	decision	profit	10-day weather forecasts
Ruane, A.C., Major, D.C., Yu, W.H., Alam, M., Hussain, S.G., Khan, A.S. et al., 2013. Multi-factor impact analysis of agricultural production in Bangladesh with climate change. Global Environmental Change, 23(1): 338-350.	biophysical	yield; flooding
Salerno, J., 2016. Migrant decision-making in a frontier landscape. Environmental Research Letters, 11(4).	decision	migration behavior
Salvini, G. et al., 2016. REDD+ and climate smart agriculture in landscapes: A case study in Vietnam using companion modelling. Journal of Environmental Management, 172: 58-70.	decision	yields; GHG emissions	policy design
Schaap, B.F., Blom-Zandstra, M., Hermans, C.M.L., Meerburg, B.G. and Verhagen, J., 2011. Impact changes of climatic extremes on arable farming in the north of the Netherlands. Regional Environmental Change, 11(3): 731-741.	meta-model	yield
Seif-Ennasr, M. et al., 2016. Climate change and adaptive water management measures in Chtouka Aït Baha region (Morocco). Sci. Total Environ., 573: 862-875.	biophysical	water supply and demand	irrigation
Seo, S.N., 2016. Modeling farmer adaptations to climate change in South America: a micro-behavioral economic perspective. Environ. Ecol. Stat., 23(1): 1-21.	decision	yield; profit	crop choice; livestock choice
Shadkam, S., Ludwig, F., van Vliet, M.T.H., Pastor, A. and Kabat, P., 2016. Preserving the world second largest hypersaline lake under future irrigation and climate change. Sci. Total Environ., 559: 317-325.	biophysical	discharge; yield	irrigation managemet
Soora, N.K., Aggarwal, P.K., Saxena, R., Rani, S., Jain, S. and Chauhan, N., 2013. An assessment of regional vulnerability of rice to climate change in India. Climatic Change, 118(3-4): 683-699.	biophysical	yield	sowing date; cultivar choice; irrigation; fertilization
Sposito, V., Benke, K., Pelizaro, C. and Wyatt, R., 2009. Application of GIS-based computer modelling to planning for adaption to climate change in rural areas. Appl. GIS, 5(3): 1-25.	suitability	land use potential
Stevanović, M. et al., 2016. The impact of high-end climate change on agricultural welfare. Science advances, 2(8): e1501452.	decision	yield; profit	crop allocation
Stöckle, C.O. et al., 2017. Evaluating opportunities for an increased role of winter crops as adaptation to climate change in dryland cropping systems of the U.S. Inland Pacific Northwest. Climatic Change: 1-15.	biophysical	yield	cultivar choice; sowing date; rotation
Stokes, C.J., Inman-Bamber, N.G., Everingham, Y.L. and Sexton, J., 2016. Measuring and modelling CO<inf>2</inf> effects on sugarcane. Environ. Model. Softw., 78: 68-78.	biophysical	yield
Strzepek, K.M. and Yates, D.N., 1996. Economic and social adaptations to climate change impacts on water resources: A case study of Egypt. Int. J. Water Resour. Dev., 12(2): 229-244.	decision	yield; irrigation demand; water availability; profit	cropped area
Sultan, B. and Gaetani, M., 2016. Agriculture in West Africa in the twenty-first century: Climate change and impacts scenarios, and potential for adaptation. Frontiers in Plant Science, 7(AUG2016).	biophysical	yield	cultivar choice; sowing date; sowing density; irrigation; fertilization
Tack, J., Lingenfelser, J. and Jagadish, S.V.K., 2017. Disaggregating sorghum yield reductions under warming scenarios exposes narrow genetic diversity in US breeding programs. Proceedings of the National Academy of Sciences of the United States of America, 114(35): 9296-9301.	empirical	yield	cultivar choice
Tao, F. and Zhang, Z., 2013. Climate change, wheat productivity and water use in the North China Plain: A new super-ensemble-based probabilistic projection. Agricultural and Forest Meteorology, 170: 146-165.	biophysical	yield	cultivar choice
Tao, F., Hayashi, Y., Zhang, Z., Sakamoto, T. and Yokozawa, M., 2008. Global warming, rice production, and water use in China: Developing a probabilistic assessment. Agricultural and Forest Meteorology, 148(1): 94-110.	biophysical	yield	irrigation; fertilization
Teixeira, E.I., Brown, H.E., Sharp, J., Meenken, E.D. and Ewert, F., 2015. Evaluating methods to simulate crop rotations for climate impact assessments - A case study on the Canterbury plains of New Zealand. Environ. Model. Softw.	biophysical	yield	rotations
Tendall, D.M. and Gaillard, G., 2015. Environmental consequences of adaptation to climate change in Swiss agriculture: An analysis at farm level. Agricultural Systems, 132: 40-51.	meta-model
Tingem, M. and Rivington, M., 2009. Adaptation for crop agriculture to climate change in Cameroon: Turning on the heat. Mitigation Adapt. Strateg. Global Change, 14(2): 153-168.	biophysical	yield	sowing date; cultivar choice
Traore, B. et al., 2017. Modelling cereal crops to assess future climate risk for family food self-sufficiency in southern Mali. Field Crops Research, 201: 133-145.	biophysical	yield	sowing date; fertilization
van Vliet, M.T.H., Donnelly, C., Strömbäck, L., Capell, R. and Ludwig, F., 2015. European scale climate information services for water use sectors. Journal of Hydrology, 528: 503-513.	biophysical	flooding; water availability
Varela-Ortega, C., Blanco-Gutiérrez, I., Esteve, P., Bharwani, S., Fronzek, S. and Downing, T.E., 2014. How can irrigated agriculture adapt to climate change? Insights from the Guadiana Basin in Spain. Regional Environmental Change.	decision	yield; irrigation demand; water availability; profit	irrigation; water storage; cultivar choice; financing instruments
Wagner, P.D., Reichenau, T.G., Kumar, S. and Schneider, K., 2013. Development of a new downscaling method for hydrologic assessment of climate change impacts in data scarce regions and its application in the Western Ghats, India. Regional Environmental Change, 15(3): 435-447.	biophysical	water availability
Waha, K., Müller, C., Bondeau, A., Dietrich, J.P., Kurukulasuriya, P., Heinke, J. and Lotze-Campen, H., 2013. Adaptation to climate change through the choice of cropping system and sowing date in sub-Saharan Africa. Global Environmental Change, 23(1): 130-143.	biophysical	yield	sowing date; rotations
Wang, Z., Qi, Z., Xue, L., Bukovsky, M. and Helmers, M.J., 2015. Modeling the impacts of climate change on nitrogen losses and crop yield in a subsurface drained field. Climatic Change, 129(1-2): 323-335.	biophysical	yield; nutrient leaching
Whitehead, P.G., Crossman, J., Balana, B.B., Futter, M.N., Comber, S., Jin, L. et al., 2013. A cost-effectiveness analysis of water security and water quality: Impacts of climate and land-use change on the River Thames system. Philos. Trans. R. Soc. A Math. Phys. Eng. Sci., 371(2002).	biophysical	water quality	fertilization; wastewater treatment
Woltersdorf, L., Liehr, S. and Döll, P., 2015. Rainwater harvesting for small-holder horticulture in Namibia: Design of garden variants and assessment of climate change impacts and adaptation. Water, 7(4): 1402-1421.	biophysical	yield; water availability; irrigation demand	water storage
Wossen, T. and Berger, T., 2015. Climate variability, food security and poverty: Agent-based assessment of policy options for farm households in Northern Ghana. Environ. Sci. Policy, 47: 95-107.	decision	yield; profit	crop diversification; fertilization; irrigation
Xiao, D. and Tao, F., 2014. Contributions of cultivars, management and climate change to winter wheat yield in the North China Plain in the past three decades. European Journal of Agronomy, 52: 112-122.	biophysical	yield	cultivar choice; irrigation; fertilization; soil management
Xiong, W. et al., 2016. Calibration-induced uncertainty of the EPIC model to estimate climate change impact on global maize yield. J. Adv. Model. Earth Syst., 8(3): 1358-1375.	biophysical	yield
Xiong, W., Holman, I., Lin, E., Conway, D., Jiang, J., Xu, Y. and Li, Y., 2010. Climate change, water availability and future cereal production in China. Agriculture, Ecosystems and Environment, 135(1-2): 58-69.	biophysical	yield; water availability; irrigation demand	irrigation
Yang, C., Fraga, H., Ieperen, W.V. and Santos, J.A., 2017. Assessment of irrigated maize yield response to climate change scenarios in Portugal. Agric. Water Manage., 184: 178-190.	biophysical	yield	irrigation
Yegbemey, R.N., Yabi, J.A., Aïhounton, G.B. and Paraïso, A., 2014. Simultaneous modelling of the perception of and adaptation to climate change: The case of the maize producers in northern Benin. Cah. Agric., 23(3): 177-187.	decision		sowing date; crop diversification; fertilization; irrigation; shift in cropland
Zamani, R., Akhond-Ali, A.M., Ahmadianfar, I. and Elagib, N.A., 2017. Optimal reservoir operation under climate change based on a probabilistic approach. Journal of Hydrologic Engineering, 22(10).	biophysical	water supply and demand	irrigation
Zessner, M. et al., 2017. A novel integrated modelling framework to assess the impacts of climate and socio-economic drivers on land use and water quality. Sci. Total Environ., 579: 1137-1151.	decision	yield; water quality; profit	crop choice; livestock; land use; fertilization; farming practice
Zhang, Q. and Zhang, J., 2016. Drought hazard assessment in typical corn cultivated areas of China at present and potential climate change. Natural Hazards, 81(2): 1323-1331.	suitability	drought limitation
Zinyengere, N., Crespo, O., Hachigonta, S. and Tadross, M., 2014. Local impacts of climate change and agronomic practices on dry land crops in Southern Africa. Agriculture, Ecosystems and Environment, 197: 1-10.	biophysical	yield	sowing date; fertilization
